# Supplementary material
Source: Springer Nature journal article supplement (https://www.springermedizin.de/resource/supplementary/12889_2011_4264_MOESM1_ESM.pdf/9491362)

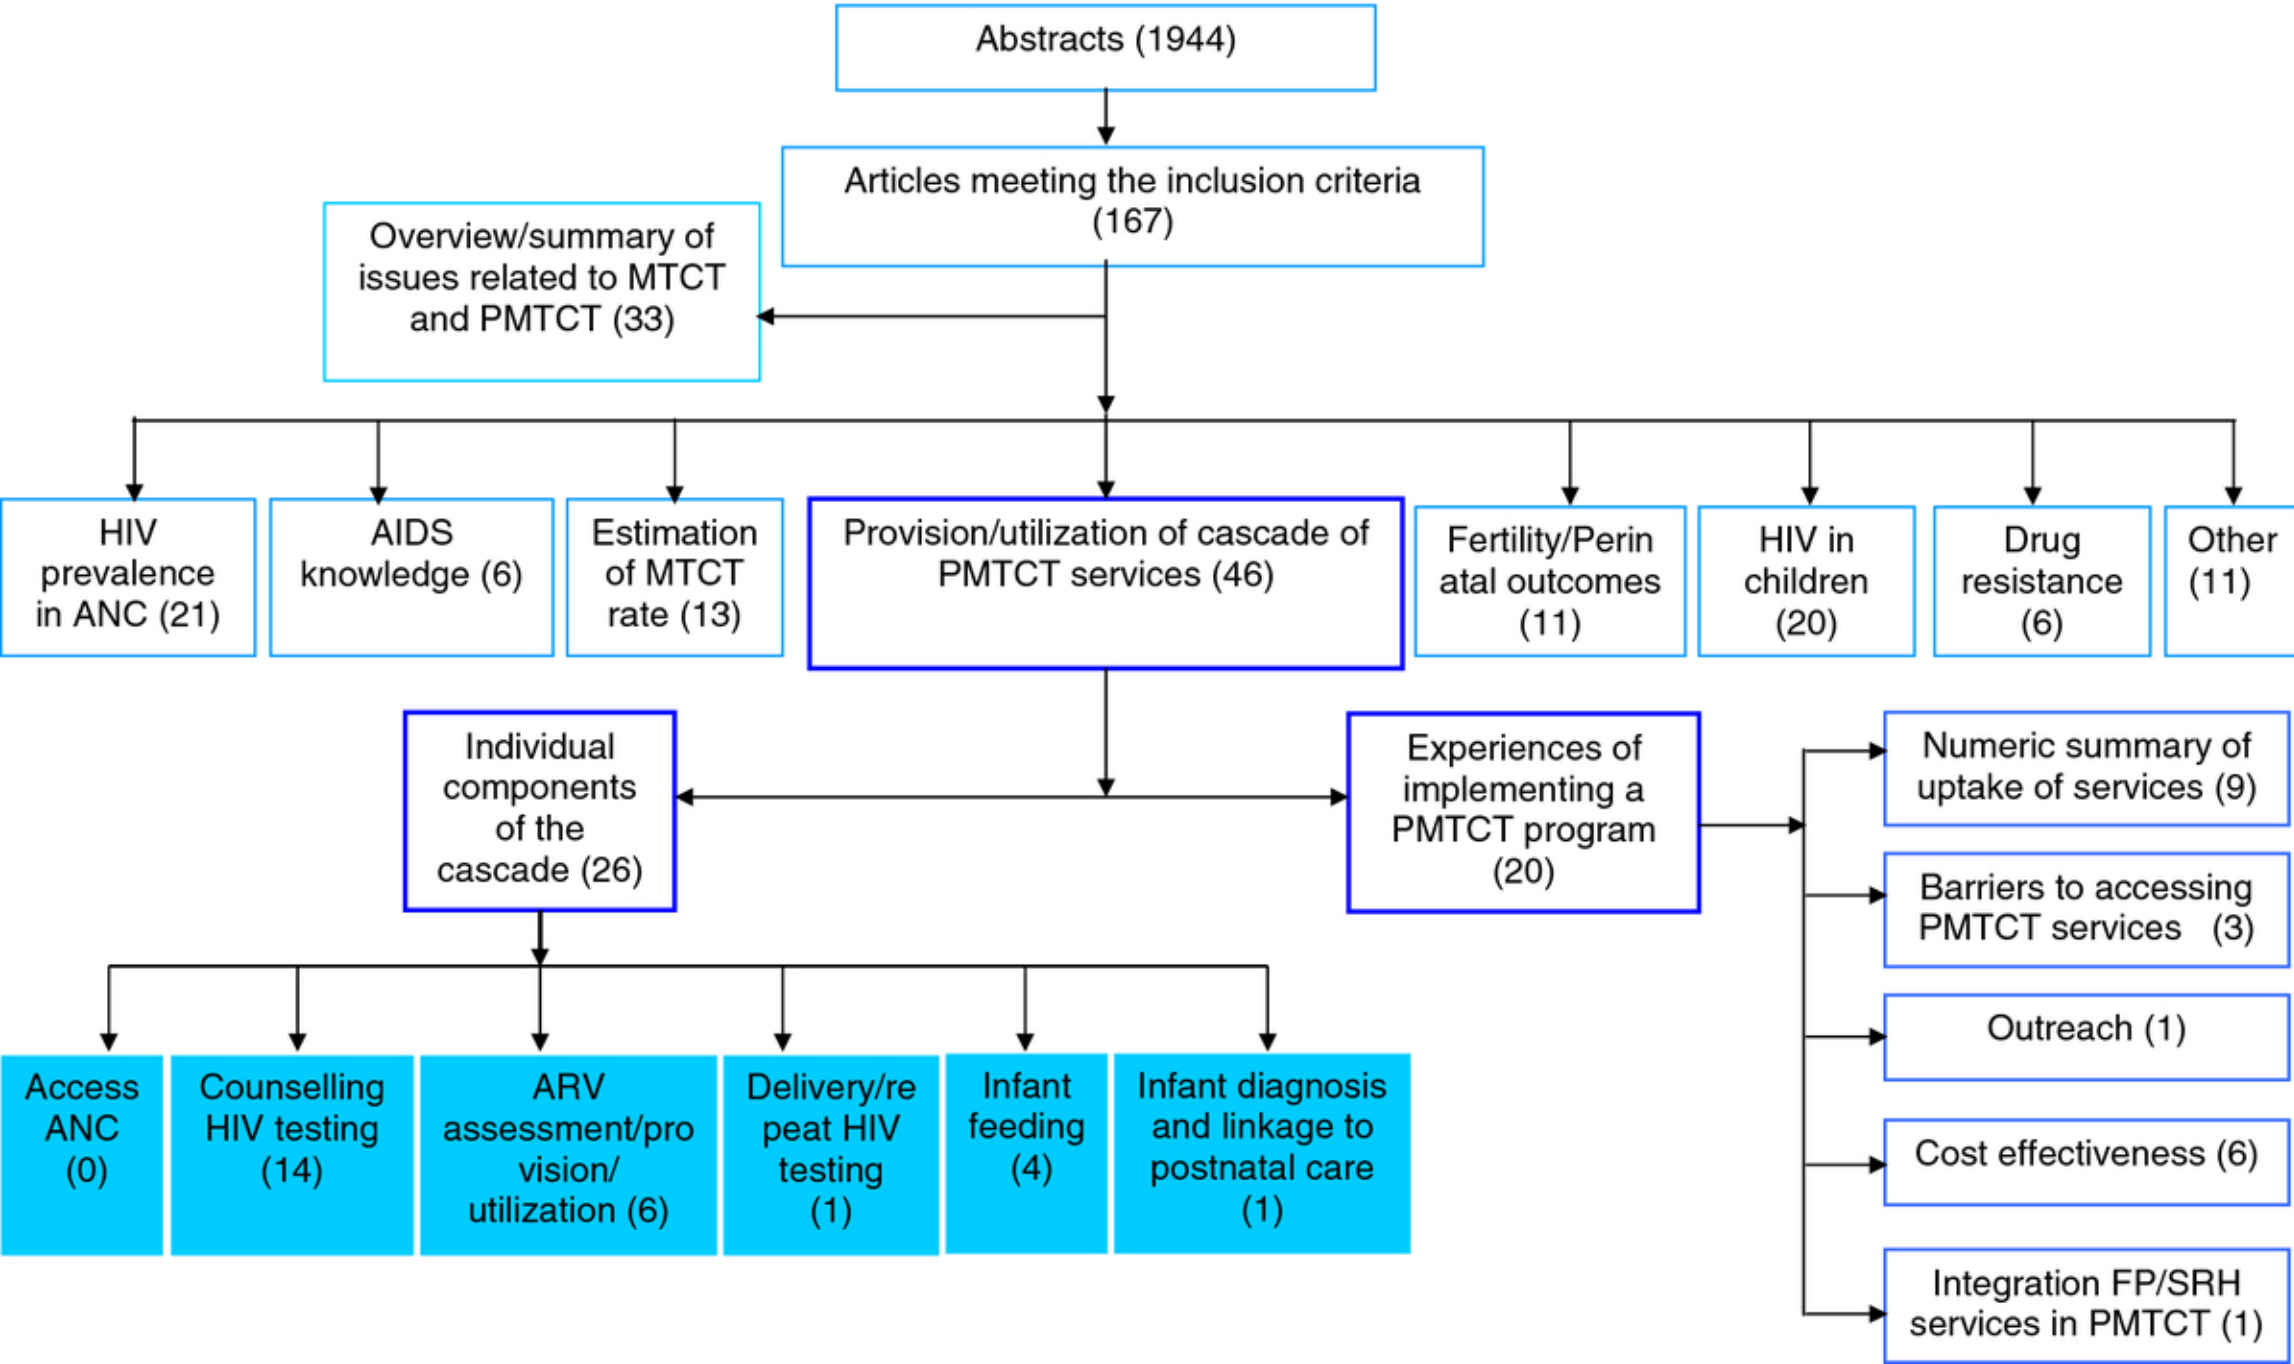

Supplement: MOESM1 [file 9491362]
